# Supplementary material for: A fast, lock-free approach for efficient parallel counting of occurrences of k -mers
Source: Oxford University Press journal article supplement (doi:10.1093/bioinformatics/btr011), 2011-01-07
Supplement: bioinformatics_27_6_764_s1.zip [file bioinformatics_27_6_764_s1.zip]

Archive with 1 entries (1 files):
- appendix.pdf
